# Supplementary material for: Continuous glucose monitoring metrics for earlier identification of pre-diabetes: protocol for a systematic review and meta-analysis
Source: HighWire-hosted journal article supplement (doi:10.1136/bmjopen-2022-061756), 2022-08-01
Supplement: bmjopen-2022-061756supp001_data_supplement.pdf [file bmjopen-2022-061756supp001_data_supplement.pdf]

(((((("diabetes prevention" [title/abstract] OR "diabetes risk\*" [title/abstract] OR "diabetes susceptibility" [title/abstract] OR "prediabet\*" [title/abstract] OR "pre-diabet\*" [title/abstract] OR "prediabetic state" [mesh]) AND ("blood glucose self-monitoring" [mesh] OR "blood sugar self monitor\*" [title/abstract] OR "blood sugar self-monitor\*" [title/abstract] OR "CGM" [title/abstract] OR "CGMS" [title/abstract] OR "glucose monitor\*" [title/abstract] OR "glucose self monitor\*" [title/abstract] OR "glucose self-monitor\*" [title/abstract] OR "monitoring, ambulatory" [mesh] OR "monitoring, physiologic/instrumentation" [mesh] OR "monitoring, physiologic/methods" [mesh] OR "personalized medicine" [title/abstract] OR "precision medicine" [mesh] OR "precision medicine" [title/abstract] OR "RT-CGM" [title/abstract])) AND ("biomarker\*" [title/abstract] OR "biomarkers/analysis" [mesh] OR "biomarkers/blood" [mesh] OR "blood chemical analys\*" [title/abstract] OR "blood chemical analysis" [mesh] OR "blood glucose self-monitoring/statistics and numerical data" [mesh] OR "blood glucose/analysis" [mesh] OR "criteria" [title/abstract] OR "deviation\*" [title/abstract] OR "dysglycemia" [title/abstract] OR "euglycemi\*" [title/abstract] OR "euglycaemi\*" [title/abstract] OR "fluctuation\*" [title/abstract] OR "glucose tolerance test" [mesh] OR "glucose" [title/abstract] OR "glucotype\*" [title/abstract] OR "glycaemic" [title/abstract] OR "glycated hemoglobin A/analysis" [mesh] OR "glycated hemoglobin A/statistics and numerical data" [mesh] OR "glycemic" [title/abstract] OR "HbA1c" [title/abstract] OR "hemoglobin A1c" [title/abstract] OR "hyperglycemia" [mesh] OR "hyperglycemia" [title/abstract] OR "metric\*" [title/abstract] OR "normal\*" [title/abstract] OR "normoglycemic\*" [title/abstract] OR "phenotyp\*" [title/abstract] OR "prediabetic state/analysis" [mesh] OR "prediabetic state/blood" [mesh] OR "prediabetic state/blood" [mesh] OR "prediabetic state/statistics and numerical data" [mesh] OR "reference values" [mesh] OR "reference\*" [title/abstract] OR "screening\*" [title/abstract] OR "standard\*" [title/abstract] OR "test\*" [title/abstract] OR "variability" [title/abstract] OR "variation\*" [title/abstract])) AND ("detect\*" [title/abstract] OR "diagnos\*" [title/abstract] OR "disease progression" [mesh] OR "early diagnosis" [mesh] OR "early medical intervention" [mesh] OR "identif\*" [title/abstract] OR "prediabet\*" [title/abstract] OR "pre-diabet\*" [title/abstract] OR "prediabetic state/classification" [mesh] OR "prediabetic state/diagnosis" [mesh] OR "prediabetic state/prevention and control" [mesh] OR "prediabetic\*" [title/abstract] OR "pre-diabetic\*" [title/abstract] OR "predict\*" [title/abstract] OR "predictive value of tests" [mesh] OR "prevent\*" [title/abstract] OR "progression\*" [mesh] OR "risk assessment" [mesh] OR "risk factors" [mesh] OR "risk\*" [title/abstract] OR "transition\*" [title/abstract])) AND ((english[Filter]))) AND ((y\_10[Filter]))
